# Supplementary material for: An urban trees parameterization for modeling microclimatic variables and thermal comfort conditions at street level with the Town Energy Balance model (TEB-SURFEX v8.0)
Source: Copernicus journal article supplement (doi:10.5194/gmd-13-385-2020), 2020-02-05
Supplement: Supplementary file 1 [file gmd-13-385-2020-supplement.zip]

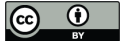

## *Supplement of*

# **An urban trees parameterization for modeling microclimatic variables and thermal comfort conditions at street level with the Town Energy Balance model (TEB-SURFEX v8.0)**

**Emilie Redon et al.**

*Correspondence to:* Aude Lemonsu ([aude.lemonsu@meteo.fr](mailto:aude.lemonsu@meteo.fr))

- [gmd-13-385-2020-supplement-title-page.pdf](#)
- [CODE\\_SURFEXV8.0.zip](#)
- [DATA.zip](#)

The copyright of individual parts of the supplement might differ from the CC BY 4.0 License.
